# Supplementary material for: Bi-layer silk fibroin skeleton and bladder acellular matrix hydrogel encapsulating adipose-derived stem cells for bladder reconstruction
Source: Royal Society of Chemistry journal article supplement (doi:10.1039/d1bm00761k), 2021-01-01

## Supplementary table and figures

**Table S1.** Detailed antibodies information for flow cytometry and immunofluorescence analyses.

**Figure S1.** Evaluation of decellularization efficiency. (A) H&E and DAPI staining of the native bladder and BAM. (B) DNA quantification of the native bladder and BAM. Scale bar = 100  $\mu\text{m}$ . \* $P < 0.05$ , \*\* $P < 0.01$ , \*\*\* $P < 0.001$ .

**Figure S2.** Flow cytometry identification of the ASCs. The CD90 and CD29 were positive expressions, and the CD45 and CD106 were negative expressions.

**Figure S3.** Histological staining of the BSFS-BAMH encapsulating the labeled ASCs. H&E (A) and DAPI (B) staining of the BSFS-BAMH-ASCs cultured in the  $\alpha$ -MEM containing 10% FBS for 7 days. Blue: the cell nuclei. Red: the CM-DiI-labeled ASCs. Scale bar = 100  $\mu\text{m}$ .

**Table S1.** Detailed antibodies information for flow cytometry and immunofluorescence analyses

| Against       | catalog                                        | Dilution |
|---------------|------------------------------------------------|----------|
| CD29-FITC     | 561796, BD Biosciences, Lake Franklin, NJ, USA | 1:200    |
| CD90-FITC     | 561973, BD                                     | 1:200    |
| CD45-FITC     | 561867, BD                                     | 1:200    |
| CD106-PE      | 559229, BD                                     | 1:200    |
| AE1/AE3       | ab80826, Abcam                                 | 1:200    |
| $\alpha$ -SMA | ab124964, Abcam                                | 1:1000   |
| NeuN          | ab177487, Abcam                                | 1:3000   |
| CD31          | ab182981, Abcam                                | 1:2000   |

**Figure S1**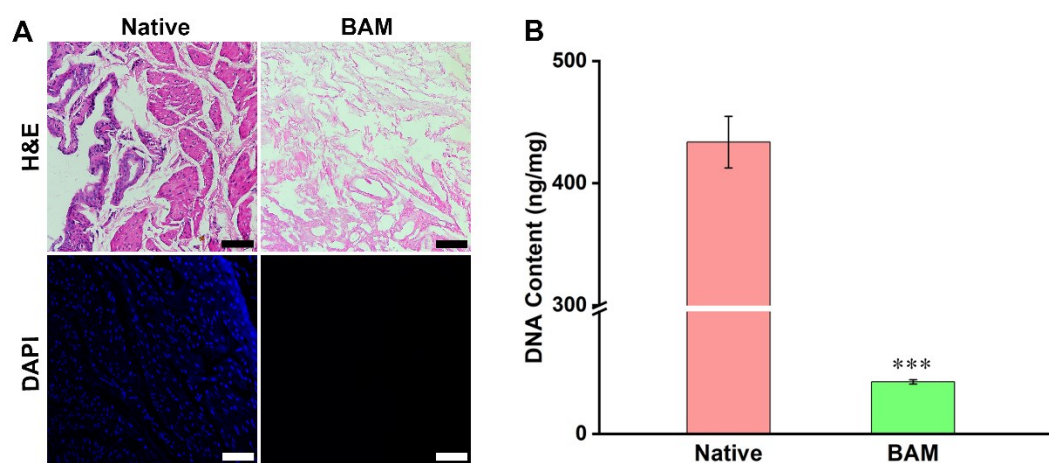

Figure S2

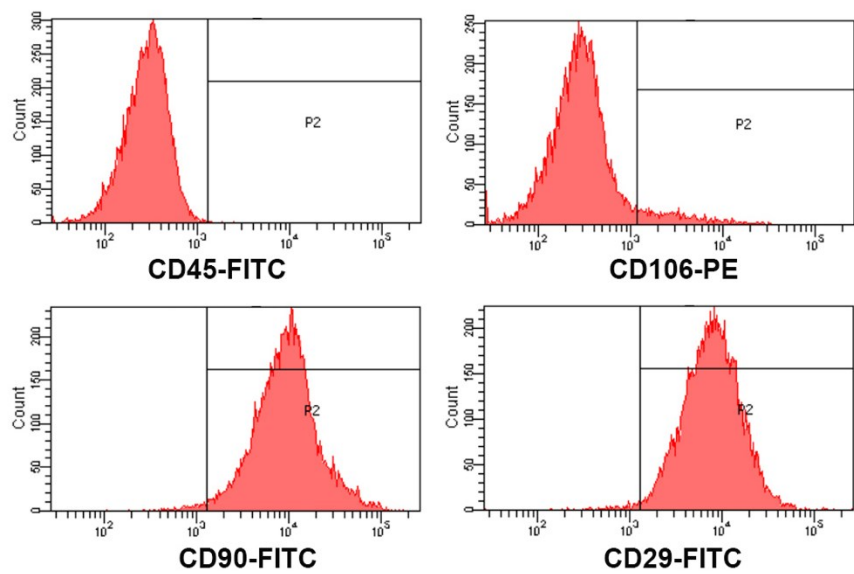

Figure S3

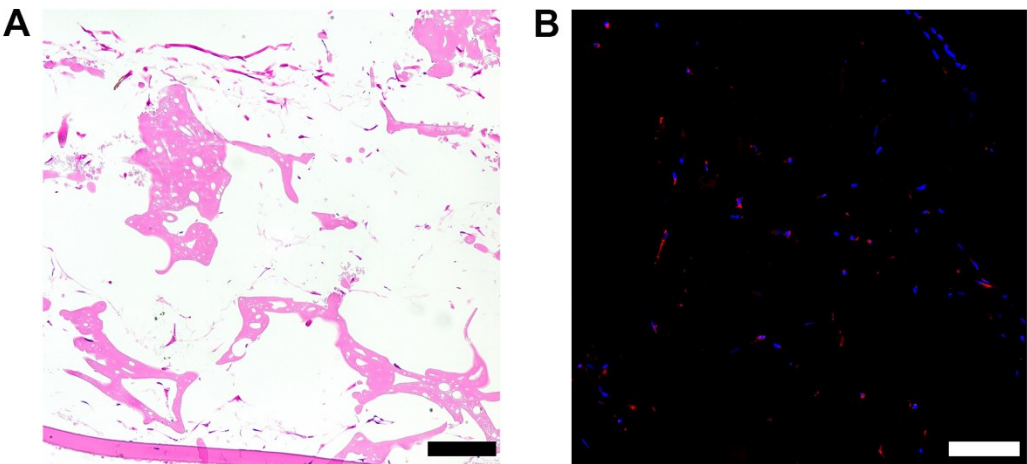

Supplement: d1bm00761k1.pdf [file d1bm00761k1.pdf]
